# Supplementary material for: Next-Generation Sequencing for Screening Analysis of Cystic Fibrosis: Spectrum and Novel Variants in a South–Central Italian Cohort
Source: MDPI journal article supplement (doi:10.3390/genes14081608), 2023-08-11
Supplement: s1 [file s1]

**Supplementary Table S1.** *CFTR* complex alleles identified in our cohort (transcript, NM\_000492.4).

| N° of subjects | Protein change      | Clinical significance |
|----------------|---------------------|-----------------------|
| 8              | p.(Gly576Ala)       | Likely benign         |
|                | p.(Arg668Cys)       |                       |
| 1              | p.(Gly576Ala)       | Unknown               |
|                | p.(Arg668Cys)       |                       |
|                | p.(Arg75Gln)        |                       |
| 1              | p.(Phe508del)       | Unknown               |
|                | p.(Arg668Cys)       |                       |
| 1              | p.(Phe508del)       | Unknown               |
|                | p.(Asn1303Lys)      |                       |
| 1              | p.(Ala455Val)       | Unknown               |
|                | c.2620-15C>G        |                       |
| 1              | p.(Ala455Val)       | Unknown               |
|                | p.(Leu997Phe)       |                       |
| 1              | p.(Arg31Cys)        | Unknown               |
|                | p.(Ala455Val)       |                       |
| 1              | p.(Arg75Gln)        | Unknown               |
|                | p.(Ala455Val)       |                       |
| 1              | c.2490+44A>C        | Unknown               |
|                | p.(Ala455Val)       |                       |
| 1              | p.(Leu967Ser)       | Unknown               |
|                | p.(Glu1418Argfs*14) |                       |
| 1              | p.(Leu1077Pro)      | Unknown               |
|                | p.(Asp192Gly)       |                       |

**Footnotes:** *CFTR*, cystic fibrosis transmembrane conductance regulator
